# Supplementary figures and images for: Optimisation of conductive polymer biomaterials for cardiac progenitor cells
Source: Royal Society of Chemistry journal article supplement (doi:10.1039/c6ra11682e), 2016-01-01

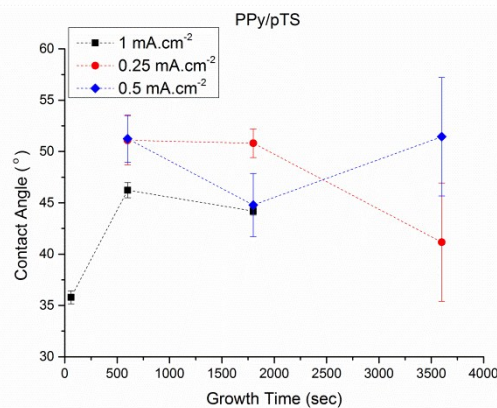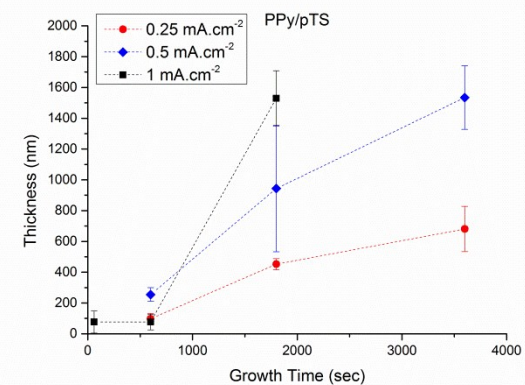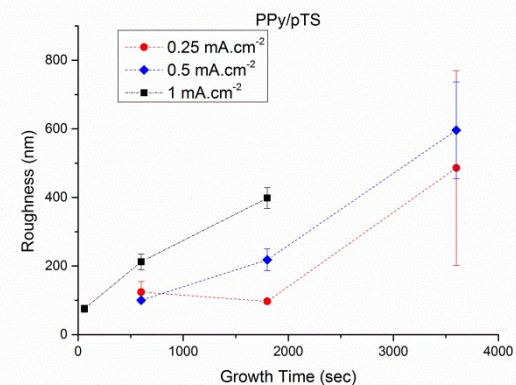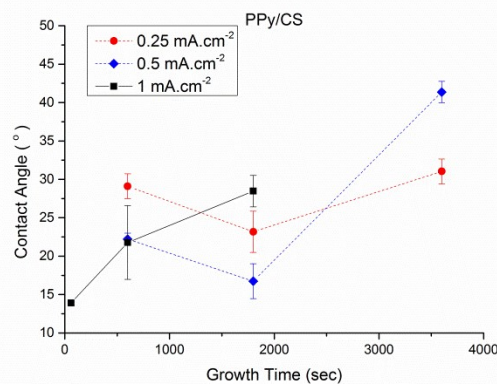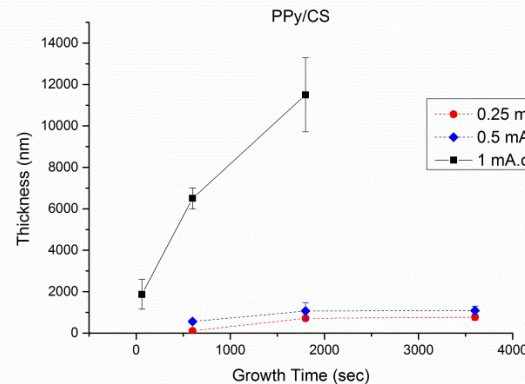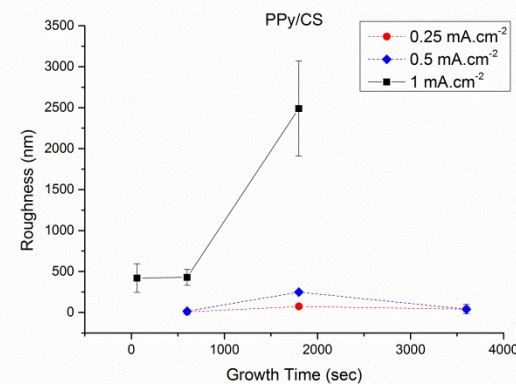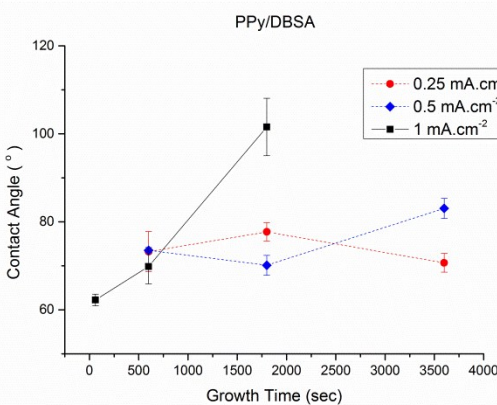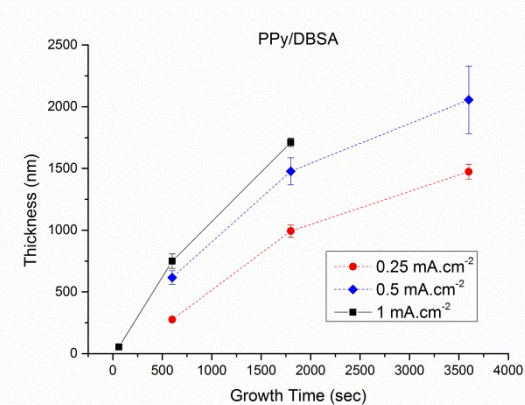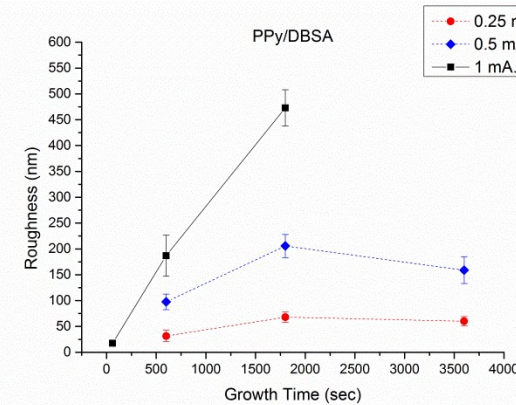

Supplement: c6ra11682e1.pdf [file c6ra11682e1.pdf]
